# Supplementary material
Source: PubMed Central journal article supplement (PMC5606008)

**SUPPLEMENTAL MATERIAL**

**Dosage Modification Based on Adverse Events**

**1- POMALIDOMIDE**

| <b>Pomalidomide Dose Reduction Steps</b> |                                                                |
|------------------------------------------|----------------------------------------------------------------|
| <b>Starting Dose</b>                     | <b>4 mg PO daily on days 1 through 21 every 28 days</b>        |
| Dose Level -1                            | Decrease to 3 mg PO daily on days 1 through 21 every 28 days   |
| Dose Level -2                            | Decrease to 2 mg PO daily on days 1 through 21 every 28 days   |
| Dose Level -3                            | Decrease to 1.5 mg PO daily on days 1 through 21 every 28 days |
| Dose Level -4                            | Decrease to 1.0 mg PO daily on days 1 through 21 every 28 days |
| Dose Level -5                            | Decrease to 0.5 mg PO daily on days 1 through 21 every 28 days |
| Dose Level -6                            | Discontinue                                                    |

| <b>Dose Modification for Pomalidomide (Based on Pomalidomide-Related Adverse Event Observed on Days 2-28)</b> |                                                                                                                                                                                                                                                                             |                                                                                                                                                                                                                                                |
|---------------------------------------------------------------------------------------------------------------|-----------------------------------------------------------------------------------------------------------------------------------------------------------------------------------------------------------------------------------------------------------------------------|------------------------------------------------------------------------------------------------------------------------------------------------------------------------------------------------------------------------------------------------|
| <b>ADVERSE EVENT/SYMPTOMS</b>                                                                                 | <b>Day 2-14 of Cycle</b>                                                                                                                                                                                                                                                    | <b>≥Day 14 of Cycle</b>                                                                                                                                                                                                                        |
| ≥ Grade 3 Febrile neutropenia<br>or<br>Grade 4 Neutrophil Count Decreased                                     | <ul style="list-style-type: none"> <li>Omit pomalidomide. Follow CBC weekly.</li> <li>If neutropenia has resolved to ≤ grade 2 restart at next lower dose level and continue the cycle</li> </ul>                                                                           | <ul style="list-style-type: none"> <li>Omit pomalidomide for remainder of cycle. Begin next cycle at next lower dose.</li> </ul>                                                                                                               |
| ≥ Grade 4 Platelet Count Decreased                                                                            | <ul style="list-style-type: none"> <li>Omit pomalidomide. Follow CBC weekly.</li> <li>If thrombocytopenia resolves to ≤ grade 2 restart at next lower dose level and continue the cycle</li> <li>Hold anticoagulation for platelet count &lt; 50,000</li> </ul>             | <ul style="list-style-type: none"> <li>Omit pomalidomide for remainder of cycle. Begin next cycle at next lower dose.</li> <li>Hold anticoagulation for platelet count &lt; 50,000</li> </ul>                                                  |
| Erythroderma<br>Grade 3<br><br>Grade 4                                                                        | <ul style="list-style-type: none"> <li>If Grade 3 Omit pomalidomide. Follow weekly.</li> <li>If the adverse event resolves to ≤ grade 2 restart at next lower dose level and continue the cycle</li> <li>Discontinue all study drugs and go to event monitoring.</li> </ul> | <ul style="list-style-type: none"> <li>Omit pomalidomide for remainder of cycle. If the adverse event resolves to ≤ grade 2 restart next cycle at next lower dose.</li> <li>Discontinue all study drugs and go to event monitoring.</li> </ul> |

|                                                                               |                                                                                                                                                                                                                                |                                                                                                                                                                                                                         |
|-------------------------------------------------------------------------------|--------------------------------------------------------------------------------------------------------------------------------------------------------------------------------------------------------------------------------|-------------------------------------------------------------------------------------------------------------------------------------------------------------------------------------------------------------------------|
| Grade 1-3 Rash maculo-papular                                                 | <ul style="list-style-type: none"> <li>• Omit pomalidomide and bortezomib for remainder of cycle. If the adverse event resolves to <math>\leq</math> grade 2 restart at next lower dose level on next cycle.</li> </ul>        | <ul style="list-style-type: none"> <li>• Omit pomalidomide and bortezomib for remainder of cycle. If the adverse event resolves to <math>\leq</math> grade 2 restart at next lower dose level on next cycle.</li> </ul> |
| Grade 3-4 Stevens-Johnson syndrome                                            | <ul style="list-style-type: none"> <li>• Discontinue all study drugs and go to event monitoring.</li> </ul>                                                                                                                    | <ul style="list-style-type: none"> <li>• Discontinue all study drugs and go to event monitoring.</li> </ul>                                                                                                             |
| $\geq$ Grade 3 Erythema multiforme                                            | <ul style="list-style-type: none"> <li>• Discontinue all study drugs and go to event monitoring.</li> </ul>                                                                                                                    | <ul style="list-style-type: none"> <li>• Discontinue all study drugs and go to event monitoring.</li> </ul>                                                                                                             |
| Peripheral motor neuropathy<br>Or<br>Peripheral sensory neuropathy<br>Grade 3 | <ul style="list-style-type: none"> <li>• If Grade 3 Omit pomalidomide. Follow weekly.</li> <li>• If the adverse event resolves to <math>\leq</math> grade 2 restart at next lower dose level and continue the cycle</li> </ul> | <ul style="list-style-type: none"> <li>• Omit pomalidomide for remainder of cycle. Begin next cycle at next lower dose.</li> </ul>                                                                                      |
| Grade 4                                                                       | <ul style="list-style-type: none"> <li>• Discontinue all study drugs and go to event monitoring.</li> </ul>                                                                                                                    | <ul style="list-style-type: none"> <li>• Discontinue all study drugs and go to event monitoring.</li> </ul>                                                                                                             |
| Sinus bradycardia/other cardiac arrhythmia<br>Grade 2                         | <ul style="list-style-type: none"> <li>• Omit pomalidomide. Follow at least weekly.</li> <li>• If the adverse event resolves to <math>\leq</math> grade 1 restart at next lower dose level and continue the cycle</li> </ul>   | <ul style="list-style-type: none"> <li>• Omit pomalidomide for the remainder of the cycle. Begin next cycle at next lower dose.</li> </ul>                                                                              |
| Grade 3                                                                       | <ul style="list-style-type: none"> <li>• Discontinue all study drugs and go to event monitoring.</li> </ul>                                                                                                                    | <ul style="list-style-type: none"> <li>• Discontinue all study drugs and go to event monitoring.</li> </ul>                                                                                                             |
| Allergic reaction<br>Grade 2-3                                                | <ul style="list-style-type: none"> <li>• Omit pomalidomide. Follow at least weekly.</li> <li>• If the adverse event resolves to <math>\leq</math> grade 1 restart at next lower dose level and continue the cycle</li> </ul>   | <ul style="list-style-type: none"> <li>• Omit pomalidomide for the remainder of the cycle. Begin next cycle at next lower dose.</li> </ul>                                                                              |
| Anaphylaxis<br>Grade 4                                                        | <ul style="list-style-type: none"> <li>• Discontinue all study drugs and go to event monitoring.</li> </ul>                                                                                                                    | <ul style="list-style-type: none"> <li>• Discontinue all study drugs and go to event monitoring.</li> </ul>                                                                                                             |
| Constipation<br>Grade 1-2                                                     | <ul style="list-style-type: none"> <li>• Initiate bowel regimen and maintain dose level.</li> </ul>                                                                                                                            | <ul style="list-style-type: none"> <li>• Initiate bowel regimen and maintain dose level.</li> </ul>                                                                                                                     |
| $\geq$ Grade 3                                                                | <ul style="list-style-type: none"> <li>• If the adverse event resolves to <math>\leq</math> grade 2 restart at next lower dose level and continue the cycle</li> </ul>                                                         | <ul style="list-style-type: none"> <li>• Omit pomalidomide for the remainder of the cycle. Begin next cycle at next lower dose.</li> </ul>                                                                              |
| Thromboembolic event<br>$\geq$ Grade 3                                        | <ul style="list-style-type: none"> <li>• Omit pomalidomide and start anticoagulation; restart at investigator's discretion (maintain dose level).</li> </ul>                                                                   | <ul style="list-style-type: none"> <li>• Omit pomalidomide for remainder of cycle and start anticoagulation. Begin next cycle at physician discretion (maintain dose level).</li> </ul>                                 |

|                                                                                                |                                                                                                                                                                                                                          |                                                                                                                                                                                                                     |
|------------------------------------------------------------------------------------------------|--------------------------------------------------------------------------------------------------------------------------------------------------------------------------------------------------------------------------|---------------------------------------------------------------------------------------------------------------------------------------------------------------------------------------------------------------------|
| Other Non-hematologic adverse events<br>Assessed as<br>POMALIDOMIDE-<br>Related $\geq$ Grade 3 | <ul style="list-style-type: none"> <li>Omit pomalidomide. Follow at least weekly.</li> <li>If the adverse event resolves to <math>\leq</math> grade 2 restart at next lower dose level and continue the cycle</li> </ul> | <ul style="list-style-type: none"> <li>Omit pomalidomide for remainder of cycle. Begin next cycle at next lower dose.</li> </ul>                                                                                    |
| $\geq$ Grade 2 Hyperthyroidism or Hypothyroidism                                               | <ul style="list-style-type: none"> <li>Omit pomalidomide for remainder of cycle, evaluate etiology, and initiate appropriate therapy. Restart pomalidomide next cycle (decrease dose by one dose level).</li> </ul>      | <ul style="list-style-type: none"> <li>Omit pomalidomide for remainder of cycle, evaluate etiology, and initiate appropriate therapy. Restart pomalidomide next cycle (decrease dose by one dose level).</li> </ul> |

## 2- BORTEZOMIB

| <b>Bortezomib Dose Reduction Steps</b> |                                                                            |                                                                            |                                                                            |
|----------------------------------------|----------------------------------------------------------------------------|----------------------------------------------------------------------------|----------------------------------------------------------------------------|
| <b>Starting Dose</b>                   | <b>1.3 mg/m<sup>2</sup></b>                                                | <b>1.0 mg/m<sup>2</sup></b>                                                | <b>0.7 mg/m<sup>2</sup></b>                                                |
| Dose Level -1                          | Decrease to 1.0 mg/m <sup>2</sup> IV daily on days 1,8,15,22 every 28 days | Decrease to 0.7 mg/m <sup>2</sup> IV daily on days 1,8,15,22 every 28 days | Decrease to 0.3 mg/m <sup>2</sup> IV daily on days 1,8,15,22 every 28 days |
| Dose Level -2                          | Decrease to 0.7 mg/m <sup>2</sup> IV daily on days 1,8,15,22 every 28 days | Decrease to 0.3 mg/m <sup>2</sup> IV daily on days 1,8,15,22 every 28 days | Discontinue                                                                |
| Dose Level -3                          | Decrease to 0.3 mg/m <sup>2</sup> IV daily on days 1,8,15,22 every 28 days | Discontinue                                                                |                                                                            |
| Dose Level -4                          | Discontinue                                                                |                                                                            |                                                                            |

| <b>Dose Modification for Bortezomib (Based on Bortezomib-Related Adverse Event Observed on Days 2-21)</b> |                                                                                                                                                                                                                 |                                                                                                                                |
|-----------------------------------------------------------------------------------------------------------|-----------------------------------------------------------------------------------------------------------------------------------------------------------------------------------------------------------------|--------------------------------------------------------------------------------------------------------------------------------|
| <b>ADVERSE EVENT/SYMPTOMS</b>                                                                             | <b>Day 2-14 of Cycle</b>                                                                                                                                                                                        | <b><math>\geq</math>Day 14 of Cycle</b>                                                                                        |
| $\geq$ Grade 3 Febrile neutropenia<br>or<br>Grade 4 Neutrophil Count Decreased                            | <ul style="list-style-type: none"> <li>Omit bortezomib. Follow CBC weekly.</li> <li>If neutropenia has resolved to <math>\leq</math> grade 2 restart at next lower dose level and continue the cycle</li> </ul> | <ul style="list-style-type: none"> <li>Omit bortezomib for remainder of cycle. Begin next cycle at next lower dose.</li> </ul> |

|                                                                                            |                                                                                                                                                                                                                                                                                                       |                                                                                                                                                                                                                                 |
|--------------------------------------------------------------------------------------------|-------------------------------------------------------------------------------------------------------------------------------------------------------------------------------------------------------------------------------------------------------------------------------------------------------|---------------------------------------------------------------------------------------------------------------------------------------------------------------------------------------------------------------------------------|
| <p>≥ Grade 4 Platelet Count Decreased</p>                                                  | <ul style="list-style-type: none"> <li>• Omit bortezomib. Follow CBC weekly.</li> <li>• If thrombocytopenia resolves to ≤ grade 2 restart at next lower dose level and continue the cycle until Day 11</li> <li>• Hold anticoagulation for platelet count &lt; 50,000</li> </ul>                      | <ul style="list-style-type: none"> <li>• Omit bortezomib for remainder of cycle. Begin next cycle at next lower dose.</li> <li>• Hold anticoagulation for platelet count &lt; 50,000</li> </ul>                                 |
| <p>Erythroderma Grade 3</p> <p>Grade 4</p>                                                 | <ul style="list-style-type: none"> <li>• If Grade 3 Omit bortezomib. Follow weekly.</li> <li>• If the adverse event resolves to ≤ grade 2 restart at next lower dose level and continue the cycle</li> <li>• Discontinue all study drugs and go to event monitoring.</li> </ul>                       | <ul style="list-style-type: none"> <li>• Omit bortezomib for remainder of cycle. Begin next cycle at next lower dose.</li> <li>• Discontinue all study drugs and go to event monitoring.</li> </ul>                             |
| <p>Grade 1-3 Rash maculo-papular</p> <p>Grade 3-4 Stevens-Johnson syndrome</p>             | <ul style="list-style-type: none"> <li>• Omit pomalidomide and bortezomib for remainder of cycle. Restart at next lower dose level on next cycle.</li> <li>• Discontinue all study drugs and go to event monitoring.</li> </ul>                                                                       | <ul style="list-style-type: none"> <li>• Omit pomalidomide and bortezomib for remainder of cycle. Restart at next lower dose level on next cycle.</li> <li>• Discontinue all study drugs and go to event monitoring.</li> </ul> |
| <p>≥ Grade 3 Erythema multiforme</p>                                                       | <ul style="list-style-type: none"> <li>• Discontinue all study drugs and go to event monitoring.</li> </ul>                                                                                                                                                                                           | <ul style="list-style-type: none"> <li>• Discontinue all study drugs and go to event monitoring.</li> </ul>                                                                                                                     |
| <p>Peripheral motor neuropathy Or Peripheral sensory neuropathy Grade 3</p> <p>Grade 4</p> | <ul style="list-style-type: none"> <li>• If Grade 3 Omit bortezomib. Follow weekly.</li> <li>• If the adverse event resolves to ≤ grade 1 or baseline grade and restart at next lower dose level and continue the cycle</li> <li>• Discontinue all study drugs and go to event monitoring.</li> </ul> | <ul style="list-style-type: none"> <li>• Omit bortezomib for remainder of cycle. Begin next cycle at next lower dose.</li> <li>• Discontinue all study drugs and go to event monitoring.</li> </ul>                             |
| <p>Sinus bradycardia/ other cardiac arrhythmia Grade 2</p> <p>Grade 3</p>                  | <ul style="list-style-type: none"> <li>• Omit bortezomib. Follow at least weekly.</li> <li>• If the adverse event resolves to ≤ grade 1 restart at next lower dose level and continue the cycle</li> <li>• Discontinue all study drugs and go to event monitoring.</li> </ul>                         | <ul style="list-style-type: none"> <li>• Omit bortezomib for the remainder of the cycle. Begin next cycle at next lower dose.</li> <li>• Discontinue all study drugs and go to event monitoring.</li> </ul>                     |

|                                                                                                            |                                                                                                                                                                                                                                                                                               |                                                                                                                                                                                                             |
|------------------------------------------------------------------------------------------------------------|-----------------------------------------------------------------------------------------------------------------------------------------------------------------------------------------------------------------------------------------------------------------------------------------------|-------------------------------------------------------------------------------------------------------------------------------------------------------------------------------------------------------------|
| <p>Allergic reaction<br/>Grade 2-3</p> <p>Anaphylaxis<br/>Grade 4</p>                                      | <ul style="list-style-type: none"> <li>• Omit bortezomib. Follow at least weekly.</li> <li>• If the adverse event resolves to <math>\leq</math> grade 1 restart at next lower dose level and continue the cycle</li> <li>• Discontinue all study drugs and go to event monitoring.</li> </ul> | <ul style="list-style-type: none"> <li>• Omit bortezomib for the remainder of the cycle. Begin next cycle at next lower dose.</li> <li>• Discontinue all study drugs and go to event monitoring.</li> </ul> |
| <p>Constipation<br/>Grade 1-2</p> <p><math>\geq</math> Grade 3</p>                                         | <ul style="list-style-type: none"> <li>• Initiate bowel regimen and maintain dose level.</li> <li>• If the adverse event resolves to <math>\leq</math> grade 2 restart at next lower dose level and continue the cycle</li> </ul>                                                             | <ul style="list-style-type: none"> <li>• Initiate bowel regimen and maintain dose level.</li> <li>• Omit bortezomib for the remainder of the cycle. Begin next cycle at next lower dose.</li> </ul>         |
| <p>Thromboembolic event<br/><math>\geq</math> Grade 3</p>                                                  | <ul style="list-style-type: none"> <li>• Omit bortezomib and start anticoagulation; restart at investigator's discretion (maintain dose level).</li> </ul>                                                                                                                                    | <ul style="list-style-type: none"> <li>• Omit bortezomib for remainder of cycle and start anticoagulation. Begin next cycle at next lower dose.</li> </ul>                                                  |
| <p>Other Non-hematologic adverse events<br/>Assessed as bortezomib - Related <math>\geq</math> Grade 3</p> | <ul style="list-style-type: none"> <li>• Omit bortezomib. Follow at least weekly.</li> <li>• If the adverse event resolves to <math>\leq</math> grade 2 restart at next lower dose level and continue the cycle</li> </ul>                                                                    | <ul style="list-style-type: none"> <li>• Omit bortezomib for remainder of cycle. Begin next cycle at next lower dose.</li> </ul>                                                                            |

## 3- DEXAMETHASONE

| <b>Dexamethasone Dose Reduction Steps</b> |                                                                       |
|-------------------------------------------|-----------------------------------------------------------------------|
| <b>Starting Dose</b>                      | <b>40 mg/day PO on days 1, 8, 15, 22. Cycles repeat every 28 days</b> |
| Dose Level -1                             | Decrease to 20 mg/day PO on Days 1, 8, 15, 22                         |
| Dose Level -2                             | Decrease to 12 mg/day PO on Days 1, 8, 15, 22                         |
| Dose Level -3                             | Decrease to 8 mg/day PO on Days 1, 8, 15, 22                          |
| Dose Level -4                             | Decrease to 4 mg/day PO on Days 1, 8, 15, 22                          |
| Dose Level -5                             | Discontinue                                                           |

| <b>SYSTEM ORGAN CLASS (SOC)</b>                      | <b>ADVERSE EVENT/SYMPTOMS</b>                                                                                                | <b>DOSAGE CHANGE</b>                                                                                                                                                           |
|------------------------------------------------------|------------------------------------------------------------------------------------------------------------------------------|--------------------------------------------------------------------------------------------------------------------------------------------------------------------------------|
| Gastrointestinal Disorders                           | Dyspepsia, gastric or duodenal ulcer, gastritis<br>Grade 1-2 (requiring medical management)                                  | Treat with H2 blockers, sucralfate, or omeprazole.<br><br>If symptoms persist despite above measures, decrease dexamethasone dose by 1 dose level.                             |
|                                                      | ≥Grade 3 (requiring hospitalization or surgery)                                                                              | Omit dexamethasone until symptoms adequately controlled. Restart by decreasing dose by 1 dose level along with concurrent therapy with H2 blockers, sucralfate, or omeprazole. |
| Investigations                                       | Grade 3 or 4 Serum amylase increased                                                                                         | Discontinue dexamethasone and do not resume. Hold pomalidomide and bortezomib at physician discretion and restart once resolved to ≤grade 2.                                   |
| General disorders and administration site conditions | Edema limbs or Edema trunk<br>≥Grade 3 (limiting function and unresponsive to therapy or anasarca).                          | Diuretics as needed, and decrease dexamethasone dose by 1 dose level.                                                                                                          |
| Psychiatric disorders                                | Confusion or Anxiety or Depression<br>≥ Grade 2 (interfering with function +/- interfering with activities of daily living). | Omit dexamethasone until symptoms adequately controlled. Restart by decreasing dose by 1 dose level.                                                                           |

|                                                 |                                                                                                                           |                                                                                                                                |
|-------------------------------------------------|---------------------------------------------------------------------------------------------------------------------------|--------------------------------------------------------------------------------------------------------------------------------|
| Musculoskeletal and connective tissue disorders | Muscle weakness<br>≥ Grade 2 (symptomatic and interfering with function +/- interfering with activities of daily living). | Decrease dexamethasone dose by 1 dose level. If weakness persists decrease dose by 1 dose level as needed.                     |
| Metabolism and nutrition disorders              | Hyperglycemia<br><input type="checkbox"/> Grade 3 or higher                                                               | Treatment with insulin or oral hypoglycemics as needed. If uncontrolled despite above measures, decrease dose by 1 dose level. |
| Any Other non- hematologic                      | <input type="checkbox"/> Grade 3 or higher                                                                                | Omit dexamethasone until symptoms adequately controlled. Restart by decreasing dose by 1 dose level.                           |

**4- A new course of treatment may begin on the scheduled Day 1 of a new cycle if:**

- The ANC is  $\geq 1,000/\mu\text{L}$ ;
- The platelet count is  $\geq 50,000/\mu\text{L}$ ;
- Any pomalidomide-related allergic reaction/hypersensitivity or sinus bradycardia/ other cardiac arrhythmia adverse event that may have occurred has resolved to  $\leq$  Grade 1 severity;
- Any other pomalidomide-related adverse event that may have occurred has resolved to  $\leq$  Grade 1

**CONSORT Flow Diagram for Phase II part of the trial**

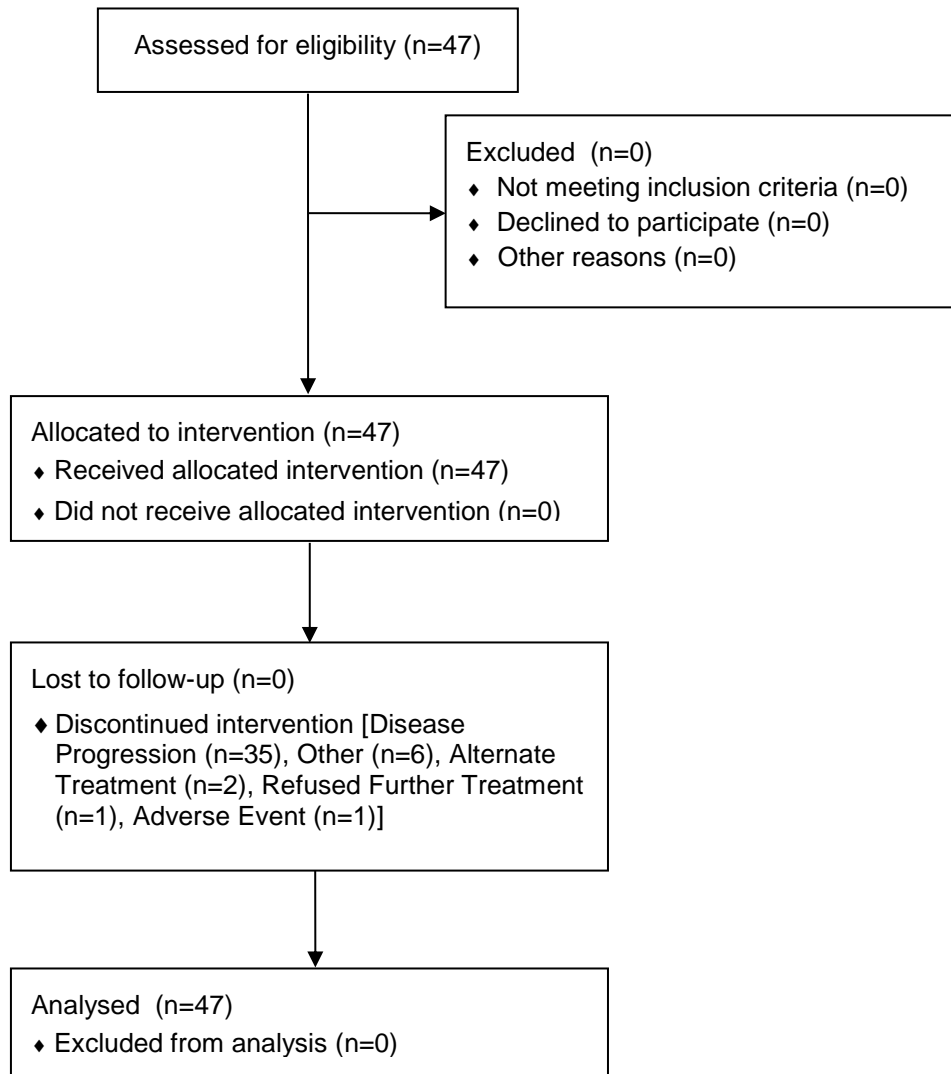

Supplement: blood782961-suppl1.pdf [file blood782961-suppl1.pdf]
